# Supplementary material for: Advanced Parkinson’s Disease Treatment Simplification and Long-Term Outcomes with Levodopa Carbidopa Intestinal Gel: COSMOS Romanian Subanalysis
Source: MDPI journal article supplement (doi:10.3390/brainsci11121566), 2021-11-27
Supplement: s1 [file s1]

Supplementary Table S1. Number of patients with add-on PD medication (without rescue medication) at LCIG initiation

| Medication                     | N (%)     |
|--------------------------------|-----------|
| Dopamine agonists (any intake) | 23 (48.9) |
| Rotigotine                     | 17 (36.2) |
| Pramiprexole                   | 4 (8.5)   |
| Ropinopriole                   | 3 (6.4)   |
| Levodopa (any intake)          | 19 (40.4) |
| Levodopa/carbidopa             | 9 (19.1)  |
| Levodopa/benserazide           | 7 (14.9)  |
| Levodopa/carbidopa/entacapone  | 5 (10.6)  |
| Rasagiline                     | 19 (40.4) |
| Amantadine                     | 1 (2.1)   |

% are calculated from the total number of 47 patients with any intake of add-on PD medications; multiple answers were allowed.

Supplementary Table S2. Reasons for start and discontinuation of add-on Parkinson's disease medication up to 12 months following LCIG initiation

|                                                         | <b>LCIG<br/>monotherapy<br/>at 12 months<br/><br/>N=29</b> | <b>LCIG<br/>monotherapy<br/>with night<br/>medication at<br/>12 months<br/><br/>N=11</b> | <b>LCIG+add-on<br/>medication at<br/>12 months<br/><br/>N=33</b> |
|---------------------------------------------------------|------------------------------------------------------------|------------------------------------------------------------------------------------------|------------------------------------------------------------------|
| <b><i>Reasons for start of add-on PD medication</i></b> |                                                            |                                                                                          |                                                                  |
| First 3 months after LCIG initiation, n (%)             | 1 (3.4%)                                                   | 8 (72.7%)                                                                                | 6 (18.2%)                                                        |
| Night medication                                        | 1 (3.4%)                                                   | 8 (72.7%)                                                                                | 2 (6.1%)                                                         |
| Rescue medication                                       | 0 (0.0%)                                                   | 3 (27.3%)                                                                                | 1 (3.0%)                                                         |
| To improve a specific symptom                           | 0 (0.0%)                                                   | 0 (0.0%)                                                                                 | 3 (9.1%)                                                         |

|                                                                  |          |           |          |
|------------------------------------------------------------------|----------|-----------|----------|
| Other                                                            | 0 (0.0%) | 0 (0.0%)  | 2 (6.1%) |
| 3 to 6 months after LCIG initiation, n (%)                       | 0 (0.0%) | 0 (0.0%)  | 2 (6.1%) |
| Lack of efficacy                                                 | 0 (0.0%) | 0 (0.0%)  | 1 (3.0%) |
| Night medication                                                 | 0 (0.0%) | 0 (0.0%)  | 1 (3.0%) |
| To improve a specific symptom                                    | 0 (0.0%) | 0 (0.0%)  | 1 (3.0%) |
| 6 to 9 months after LCIG initiation, n (%)                       | 0 (0.0%) | 1 (9.1%)  | 0 (0.0%) |
| Night medication                                                 | 0 (0.0%) | 1 (9.1%)  | 0 (0.0%) |
| <b><i>Reason for discontinuation of add-on PD medication</i></b> |          |           |          |
| First 3 months after LCIG initiation, n (%)                      | 1 (3.4%) | 2 (18.2%) | 0 (0.0%) |
| LCIG initiation                                                  | 1 (3.4%) | 2 (18.2%) | 0 (0.0%) |
| Lack of efficacy                                                 | 0 (0.0%) | 1 (9.1%)  | 0 (0.0%) |
| Not needed anymore                                               | 0 (0.0%) | 1 (9.1%)  | 0 (0.0%) |
| Intolerability                                                   | 0 (0.0%) | 1 (9.1%)  | 0 (0.0%) |
| 3 to 6 months after LCIG initiation, n (%)                       | 2 (6.9%) | 0 (0.0%)  | 1 (3.0%) |
| LCIG initiation                                                  | 1 (3.4%) | 0 (0.0%)  | 0 (0.0%) |
| Lack of efficacy                                                 | 1 (3.4%) | 0 (0.0%)  | 0 (0.0%) |
| Not needed anymore                                               | 0 (0.0%) | 0 (0.0%)  | 1 (3.0%) |
| 6 to 9 months after LCIG initiation, n (%)                       | 0 (0.0%) | 0 (0.0%)  | 1 (3.0%) |
| LCIG initiation                                                  | 0 (0.0%) | 0 (0.0%)  | 1 (3.0%) |
| 9 to 12 months after LCIG initiation, n (%)                      | 1 (3.4%) | 1 (9.1%)  | 0 (0.0%) |
| Lack of efficacy                                                 | 0 (0.0%) | 1 (9.1%)  | 0 (0.0%) |
| Not needed anymore                                               | 0 (0.0%) | 1 (9.1%)  | 0 (0.0%) |
| Patient / Caregiver preference                                   | 1 (3.4%) | 0 (0.0%)  | 0 (0.0%) |

LCIG=levodopa-carbidopa intestinal gel; N/n(%)=number (percentage) of patients;  
PD=Parkinson's disease; MAO=monoamine oxidase; NMDA= N-methyl-D-aspartate receptor

Supplementary Table S3. UPDRS total and subdomain scores, non-motor symptoms and cognitive mental status at LCIG initiation and at study visit, by study groups

|                                       | LCIG monotherapy at 12 months |                  |                   | LCIG monotherapy with night medication at 12 months |                 |               | LCIG+ add-on medication at 12 months |                 |                   |
|---------------------------------------|-------------------------------|------------------|-------------------|-----------------------------------------------------|-----------------|---------------|--------------------------------------|-----------------|-------------------|
|                                       | Before LCIG initiation        | Study visit      | p-value           | Before LCIG initiation                              | Study visit     | p-value       | Before LCIG initiation               | Study visit     | p-value           |
| UPDRS total score                     | 50.5±31.6                     | 52.9±25.3        | 0.2500            | 127.0                                               | 55.5±24.8       | 1.0000        | 39.0                                 | 38.6±20.1       | 1.0000            |
| Mood (UPDRS I)                        | 4.5±5.7                       | 2.8±2.8          | 1.0000            | -                                                   | 2.7±1.7         |               | 3.0                                  | 2.5±2.0         | 1.0000            |
| ADL (UPDRS II)                        | 16.7±6.7                      | 16.6±7.6         | 0.2012            | 5.0                                                 | 18.4±7.9        | 1.0000        | <b>16.3±7.2</b>                      | <b>13.1±6.6</b> | <b>0.0469</b>     |
| Motor symptoms (UPDRS III)            | <b>15.2±10.0</b>              | <b>29.7±14.6</b> | <b>0.0117</b>     | 8.0                                                 | 28.8±16.3       | 1.0000        | 19.1±8.7                             | 20.1±12.2       | 0.8125            |
| Complications of therapy (UPDRS IV)   | 5.3±4.9                       | 3.8±3.7          | 0.9844            | 8.0                                                 | 5.5±3.4         | 1.0000        | 2.9±1.1                              | 2.9±1.7         | 0.9063            |
| Modified Hoehn & Yahr Stage (UPDRS V) | 0 (0.0)                       | 0 (0.0%)         |                   | 1 (25.0)                                            | 1 (9.1%)        |               | 0 (0.0)                              | 0 (0.0%)        |                   |
| Stage 1                               | 1 (4.8)                       | 1 (3.4%)         |                   | 0 (0.0)                                             | 0 (0.0%)        |               | 0 (0.0)                              | 0 (0.0%)        |                   |
| Stage 1.5                             | 12 (57.1)                     | 16 (55.2%)       |                   | 1 (25.0)                                            | 3 (27.3%)       |               | 8 (72.7)                             | 25 (78.1%)      |                   |
| Stage 3                               | 7 (33.3)                      |                  |                   | 2 (50.0)                                            | 7 (63.6%)       |               | 2 (18.2)                             |                 |                   |
| Stage 4                               | 1 (4.8)                       | 11 (37.9%)       |                   | 0 (0.0)                                             | 0 (0.0%)        |               | 1 (9.1)                              | 7 (21.9%)       |                   |
| Stage 5                               |                               | 1 (3.4%)         |                   |                                                     |                 |               |                                      | 0 (0.0%)        |                   |
| NMSS total score                      | NE                            | 34.9±40.6        | NE                | NE                                                  | 57.3±39.0       | NE            | NE                                   | 34.1±29.2       | NE                |
| MMSE                                  | <b>28.3±3.0</b>               | <b>27.0±2.9</b>  | <b>&lt;0.0001</b> | <b>26.3±2.2</b>                                     | <b>24.7±4.2</b> | <b>0.0020</b> | <b>28.7±1.9</b>                      | <b>27.5±3.5</b> | <b>&lt;0.0001</b> |

\*p-value for comparison of values before LCIG initiation and at study visit

Results are displayed as mean±standard deviation, if not otherwise specified.

LCIG=levodopa-carbidopa intestinal gel; MMSE=Mini-Mental State Examination; N=number of patients; NE=not evaluated; NMSS=non-motor symptom scale; UPDRS=Unified Parkinson's Disease Rating Scale

Supplementary Table S4. Duration of “Off” time and “On” time with dyskinesia at LCIG initiation by treatment groups at 12 months

|                                                  | n  | %    | Mean number of hours | SD  |
|--------------------------------------------------|----|------|----------------------|-----|
| <b>Duration of “Off” time at LCIG initiation</b> |    |      |                      |     |
| LCIG monotherapy                                 | 23 | 34.9 | 5.9                  | 3.5 |
| LCIG monotherapy + night medication              | 3  | 4.5  | 10.0                 | 3.5 |
| LCIG + add-on without night medication           | 32 | 48.5 | 4.9                  | 1.0 |
| LCIG + add-on including night medication         | 8  | 12.1 | 11.6                 | 4.3 |
| Total population                                 | 66 | 100  | 6.3                  | 3.5 |
|                                                  |    |      |                      |     |
| <b>Duration of dyskinesia at LCIG initiation</b> |    |      |                      |     |
| LCIG monotherapy                                 | 24 | 35.3 | 2.3                  | 1.9 |
| LCIG monotherapy + night medication              | 2  | 2.9  | 4.0                  | 5.7 |
| LCIG + add-on without night medication           | 33 | 48.5 | 2.1                  | 1.9 |
| LCIG + add-on including night medication         | 9  | 13.2 | 4.2                  | 5.9 |
| Total population                                 | 68 | 100  | 2.5                  | 2.9 |

LCIG=levodopa-carbidopa intestinal gel

Supplementary Table S5. Patient reported outcomes as assessed at study visit, by study groups

|                           | <b>LCIG monotherapy at 12 months</b> | <b>LCIG monotherapy with night medication at 12 months</b> | <b>LCIG+add-on medication at 12 months</b> | <b>p-value</b>     |
|---------------------------|--------------------------------------|------------------------------------------------------------|--------------------------------------------|--------------------|
|                           | <b>N=29</b>                          | <b>N=11</b>                                                | <b>N=33</b>                                |                    |
| PDQ-8 summary index score | 44.9±21.2                            | 38.9±18.2                                                  | 39.9±20.9                                  | 0.5672*<br>0.3960# |
| QUIP-RS total score       | 6.7±10.1                             | 11.8±12.3                                                  | 7.2±14.1                                   | 0.1421*<br>0.5317# |

|                    |           |          |           |                     |
|--------------------|-----------|----------|-----------|---------------------|
| Gambling           | 0.4±1.3   | 0.0±0.0  | 0.5±1.7   |                     |
| Sex                | 0.7±1.9   | 1.3±2.5  | 1.3±2.6   |                     |
| Buying             | 0.8±1.6   | 3.6±3.6  | 1.4±3.0   |                     |
| Eating             | 1.5±2.5   | 2.0±2.9  | 1.4±2.8   |                     |
| Hobbyism/punding   | 2.1±4.1   | 4.1±6.0  | 2.4±5.5   |                     |
| Medication use     | 1.8±3.2   | 2.4±3.7  | 1.5±3.9   |                     |
| Total ICD score    | 2.9±4.6   | 6.4±5.9  | 3.7±7.0   |                     |
| PDSS-2 total score | 21.7±11.7 | 22.0±7.9 | 22.6±10.9 | 0.7249*             |
|                    |           |          |           | 0.6832              |
| BMQ                |           |          |           |                     |
| Overuse            | 2.5±1.1   | 3.0±1.0  | 2.4±1.0   | 0.3348*             |
|                    |           |          |           | 0.3845 <sup>#</sup> |
| Harm               | 2.3±1.0   | 2.4±1.0  | 2.0±0.9   | 0.8555*             |
|                    |           |          |           | 0.1245 <sup>#</sup> |
| Necessity          | 4.6±0.4   | 4.7±0.5  | 4.2±0.9   | 0.4390*             |
|                    |           |          |           | 0.1077 <sup>#</sup> |
| Concern            | 3.0±1.1   | 2.9±0.8  | 2.9±1.2   | 0.9360*             |
|                    |           |          |           | 0.8063 <sup>#</sup> |

\*p-value for comparison of monotherapy against monotherapy with night medication

<sup>#</sup>p-value for comparison of monotherapy against add-on therapy

Results are displayed as mean±standard deviation, if not otherwise specified.

N=number of patients; LCIG=levodopa/carbidopa intestinal gel; PDQ-8=Parkinson's Disease Questionnaire 8-item; QUIP-RS=Questionnaire for Impulsive-Compulsive Disorders in Parkinson's Disease – Rating Scale; PDSS-2=Parkinson's Disease Sleep Scale-2; BMQ=Beliefs Medication Questionnaire

Supplementary Table S6. Occurrence of adverse drug reactions from LCIG therapy initiation up to the study visit

|                             | <b>LCIG initiation<br/>N=95</b> | <b>LCIG maintenance<br/>treatment<br/>N=95</b> |
|-----------------------------|---------------------------------|------------------------------------------------|
| Any adverse reaction, n (%) | 1 (1.1)                         | 3 (3.2)                                        |
| Polyneuropathy, n (%)       | 1 (1.1)                         | 1 (1.1)                                        |
| Stoma site discharge, n (%) | 0                               | 1 (1.1)                                        |
| Embedded device, n (%)      | 0                               | 1 (1.1)                                        |

LCIG=levodopa/carbidopa intestinal gel; N/n (%)=number (percentage) of patients
